# Supplementary material
Source: Springer Nature journal article supplement (https://www.springermedizin.de/resource/supplementary/12885_2007_1062_MOESM3_ESM.pdf/9471008)
Supplement: MOESM3 [file 9471008]

M805 (10 clones, 299/460 )

MDA-MB-231 (15 clones, 638/690)

MCF-7 (11 clones, 1/506)

30

90

80

80

100

87

100

100

0

0

0

0

1141 -TGG GTG GGA GGG TGT TT **C** GTG GGG A **C** G TTT TTG T **C** G TAG **C** GT T

50

40

60

50

90

60

60

60

60

93

100

100

100

93

87

100

93

93

0

0

0

0

0

0

0

0

0

**C** G GTT A **C** G **C** G **C** GAG GTT T **C** G TTT TTA GGA **C** G **C** GTT **C** G **C**

60

50

90

60

60

60

60

100

60

87

100

100

100

100

0

0

0

0

0

0

0

GG GA **C** GGA TT **C** GTT TAT TT **C** GTA GT **C** GT **C** GGTT **C** GT **C** G

40

90

60

70

100

90

60

66

87

93

80

100

100

100

0

0

0

0

0

0

0

**C** G **C** GT TTT GTG GG **C** GTT GTA GTT T **C** G GAG TT **C** G **C** G TG **C** G

40

90

20

50

70

60

100

100

100

100

80

93

0

0

0

0

0

0

**C** G GGG T **C** G GGT T **C** G GGA GTT TTA GGG TAG T **C** G TTT **C** GT **C** G

80

90

90

40

30

40

100

100

93

100

93

93

0

0

0

0

0

0

A GT **C** GTA GGT AT **C** GG TGG GGA A **C** G GGG TTA **C** GG GG **C** G **C** GTG

80

30

40

80

93

93

73

93

9

0

0

0

T **C** G GGG GTT G **C** G GGG TGT TT **C** GGG GTT TTG GG GTG AGT G **C** G GGG

80

60

60

100

100

100

0

0

0

**C** G **C** GGG T **C** G AGG TTT GTA GGG TTT TGT GAG G - 1454
